# Supplementary material for: Efficient white polymer light-emitting diodes (WPLEDs) based on double emitting layers of a PVK:Eu(iii)-complex and Alq3
Source: Royal Society of Chemistry journal article supplement (doi:10.1039/c8tc06610h), 2019-01-01

## Electronic Supporting Information Available

### Efficient white polymer light-emitting diodes (WPLEDs) based on double emitting layers of PVK:Eu(III)-complex and Alq<sub>3</sub>

Yani He, Lin Liu, Guorui Fu, Wentao Li, Xingqiang Lü, Hongshan He and Wai-Yeung Wong

#### Supporting information

##### Materials and methods

High performance liquid chromatography (HPLC)-grade MeCN was purchased from Fisher Scientific and purified over solvent columns. Other solvents were used as received from Sigma Aldrich and stored over 3 Å activated molecule sieves. The typical H<sub>2</sub>Salen (N,N'-bis(salicylidene)cyclohexane-1,2-diamine) Schiff-base ligand was synthesized from the condensation reaction<sup>1</sup> of an equimolar mixture of *cis*- and *trans*-1,2-diaminocyclohexane and salicylaldehyde from the literature. Other chemicals including materials PVK (Poly(*N*-vinylcarbazole);  $M_w \approx 90000$  g/mol), Alq<sub>3</sub> and BCP et al for device fabrication, were commercial products of reagent grade and were used without further purification.

Elemental analyses were performed on a Perkin-Elmer 240C elemental analyzer. Fourier Transform Infrared (FT-IR) spectra were recorded on a Nicolet Magna-IR 550 spectrophotometer in the region 4000-400 cm<sup>-1</sup> using KBr pellets. <sup>1</sup>H NMR spectra were recorded on a JEOL EX 400 spectrometer with SiMe<sub>4</sub> as internal standard in DMSO-*d*<sub>6</sub> at room temperature. ESI-MS was performed on a Finnigan LCQ<sup>DECA</sup> XP HPLC-MS<sub>n</sub> mass

spectrometer with a mass to charge ( $m/z$ ) range of 4000 using a standard electro-spray ion source and MeCN as the solvent. Electronic absorption spectra in the UV/Visible region were recorded with a Cary 300 UV spectrophotometer. Visible emission and excitation spectra were collected by a combined fluorescence lifetime and steady-state spectrometer (FLS-980, Edinburgh) with a 450 W Xe lamp. Excited-state decay times were obtained by the same spectrometer but with a  $\mu$ F900 Xe lamp. The luminescent absolute overall quantum yield ( $\Phi_{em}$  or  $\Phi_{Ln}^L$ ) was determined by the same spectrometer using a 450 W Xe lamp and an integrating sphere. Thermal properties were characterized using thermogravimetric (TG) analyses on a NETZSCH TG 209 instrument under flowing nitrogen at a heating rate of 10 °C/min.

### **X-ray crystallography**

X-ray quality crystals of complex [Zn(Salen)( $\mu$ -OAc)Tb(DBM)<sub>2</sub>] (**3**) were mounted onto thin glass fibers. Intensity data were collected on a Bruker SMART CCD diffractometer ((Mo-K $\alpha$  radiation and  $\lambda = 0.71073$  Å) in  $\Phi$  and  $\omega$  scan modes. Structures were solved by Direct methods followed by difference Fourier syntheses, and refined by full-matrix least-squares techniques against  $F^2$  using SHELXTL.<sup>2</sup> All other non-hydrogen atoms were refined with anisotropic thermal parameters. Absorption corrections were applied using SADABS.<sup>3</sup> All hydrogen atoms were placed in calculated positions and refined isotropically using a riding model. Crystallographic data and selected bond lengths and angles are presented in Tables 1-2S, respectively. CCDC reference number 1561008 for complex **3**.

### Cyclic voltammetry (CV) measurement

Cyclic voltammetry (CV) measurement was performed on a computer-controlled EG&G Potentiostat/Galvanostat model 283 at room temperature with a conventional three-electrode cell using using a an Ag/AgNO<sub>3</sub> (0.1 M) reference electrode, Pt carbon working electrode of 2 mm in diameter, and a platinum wire counter electrode. CV of the sample was performed in nitrogen-saturated dichloromethane containing 0.1 M Bu<sub>4</sub>NPF<sub>6</sub> as supporting electrolyte. The cyclic voltammogram was measured at a scan rate of 100 mV·s<sup>-1</sup>. The highest occupied molecular orbit (HOMO) and the lowest unoccupied molecular orbit (LUMO) energy levels of complex **3** are calculated according to the following equations,<sup>4</sup>

$$E_{\text{HOMO}} = -(E_{\text{OXD}} - E_{\text{OXD, ferrocene}}) - 4.8 \text{ eV}, E_{\text{LUMO}} = E_{\text{HOMO}} + E_{\text{g}} \text{ eV},$$

and where  $E_{\text{g}}$  is the energy band gap estimated from the low-energy edge of the absorption spectra from the samples. The HOMO and LUMO energy levels for the other used materials were obtained from the literature.<sup>5</sup>

### PLEDs' fabrication and characterization

The PLED-I and PLEDs-II-A-C were fabricated on ITO coated glass substrates with a sheet of 20 Ω per square. Patterned ITO coated glass substrates were washed with acetone, detergent, distilled water and isopropanol in an ultrasonic bath. After being exposed under oxygen plasma for 20 min, PEDOT:PSS from water solution was spin-coated at 2000 rpm on the substrate and followed by drying in a vacuum oven at 140 °C for 20 min, giving a film of 40 nm. The chlorobenzene solution (at a concentration of 10 mg/mL) of PVK and a stipulated doping amount of complex **2** (20%, 30% or 40%; wt% versus PVK) as the EML1 was prepared

under N<sub>2</sub> atmosphere and spin-coated on the PEDOT:PSS layer with a thickness of 40 nm. Subsequently, the Alq<sub>3</sub> layer (20 nm) as the EML2 and the following BCP layer (20 or 10 nm) were thermally deposited onto the EML1. Finally, a thin layer of LiF (1 nm) followed by 100 nm thickness Al capping layer was deposited onto the substrate under vacuum of 5 × 10<sup>-6</sup> Pa. The typical active area of the four devices is 9 mm<sup>2</sup>. Current density (*J*)-voltage (*V*)-luminance (*L*) was collected using a Keithley 2400 source meter equipped with a calibrated silicon photodiode. The electroluminescent spectra were measured by a PR655 spectrometer. The external quantum efficiency ( $\eta_{EQE}$ ) values were determined by a Si photodiode with calibration in an integration sphere (IS080, Labsphere).

## References

- 1 X. Q. Lü, W. Y. Bi, W. L. Chai, J. R. Song, J. X. Meng, W. Y. Wong, W. K. Wong and R. A. Jones, *New J. Chem.*, 2008, **32**, 127-131.
- 2 G. M. Sheldrick, *SHELXL-97, Program for Crystal Structure Refinement*, University of Göttingen, Göttingen, Germany, 1997.
- 3 G. M. Sheldrick, *SADABS*, University of Göttingen, Göttingen, Germany, 1996.
- 4 H. Y. Chen, C. T. Chen and C. T. Chen, *Macromolecules*, 2010, **43**, 3613-3623.
- 5 E. Zysman-Colman, S. S. Ghosh, G. Xie, S. Varghese, M. Chowdhury, N. Sharma, D. B. Cordes, A. M. Z. Slawin and I. D. W. Samuel, *ACS Appl. Mater. Interfaces*, 2016, **8**, 9247-9253.

**Table 1S** Crystallographic data and structure refinement for complex **3**.

| compound                                                     | <b>3</b>                                                           |
|--------------------------------------------------------------|--------------------------------------------------------------------|
| formula                                                      | C <sub>52</sub> H <sub>45</sub> N <sub>2</sub> O <sub>8</sub> ZnTb |
| fw                                                           | 1050.19                                                            |
| cryst syst                                                   | Monoclinic                                                         |
| space group                                                  | <i>P2(1)/n</i>                                                     |
| <i>a</i> , Å                                                 | 14.288(5)                                                          |
| <i>b</i> , Å                                                 | 13.854(5)                                                          |
| <i>c</i> , Å                                                 | 28.391(10)                                                         |
| $\alpha$ , deg                                               | 90                                                                 |
| $\beta$ , deg                                                | 103.983(9)                                                         |
| $\gamma$ , deg                                               | 90                                                                 |
| <i>V</i> , Å <sup>3</sup>                                    | 5453(3)                                                            |
| <i>Z</i>                                                     | 4                                                                  |
| $\rho$ , g·cm <sup>-3</sup>                                  | 1.279                                                              |
| size, mm                                                     | 0.22 × 0.21 × 0.19                                                 |
| $\mu$ (Mo-K $\alpha$ ), mm <sup>-1</sup>                     | 1.774                                                              |
| data/restraints/parameters                                   | 9611/725/577                                                       |
| quality-of-fit indicator                                     | 0.891                                                              |
| final <i>R</i> indices [ <i>I</i> > 2 $\sigma$ ( <i>I</i> )] | <i>R</i> <sub>1</sub> = 0.111<br><i>wR</i> <sub>2</sub> = 0.2437   |
| <i>R</i> indices (all data)                                  | <i>R</i> <sub>1</sub> = 0.3187<br><i>wR</i> <sub>2</sub> = 0.3314  |

**Table 2S** Selected bond lengths (Å) and bond angles (°) in complex **3**.

| <b>3</b>        |           |                 |           |
|-----------------|-----------|-----------------|-----------|
| Zn(1)-N(1)      | 2.060(20) | Zn(1)-N(2)      | 2.030(20) |
| Zn(1)-O(1)      | 2.020(16) | Zn(1)-O(2)      | 2.034(14) |
| Zn(1)-O(7)      | 1.994(17) |                 |           |
| Tb(1)-O(1)      | 2.318(14) | Tb(1)-O(2)      | 2.256(15) |
| Tb(1)-O(3)      | 2.201(16) | Tb(1)-O(4)      | 2.237(15) |
| Tb(1)-O(5)      | 2.228(15) | Tb(1)-O(6)      | 2.243(14) |
| Tb(1)-O(8)      | 2.317(16) | Zn(1)⋯Tb(1)     | 3.277(3)  |
|                 |           |                 |           |
| N(1)-Zn(1)-N(2) | 80.8(10)  | N(1)-Zn(1)-O(1) | 88.8(9)   |
| N(1)-Zn(1)-O(2) | 151.9(8)  | N(1)-Zn(1)-O(7) | 110.6(8)  |
| O(1)-Tb(1)-O(2) | 72.6(5)   | O(1)-Tb(1)-O(8) | 75.5(5)   |
| O(3)-Tb(1)-O(4) | 75.9(6)   | O(5)-Tb(1)-O(6) | 73.4(5)   |

**Scheme 1S.** Synthesis scheme of the complex precursor  $[\text{Zn}(\text{Salen})(\text{MeCN})]$  and its complexes **1-4**.

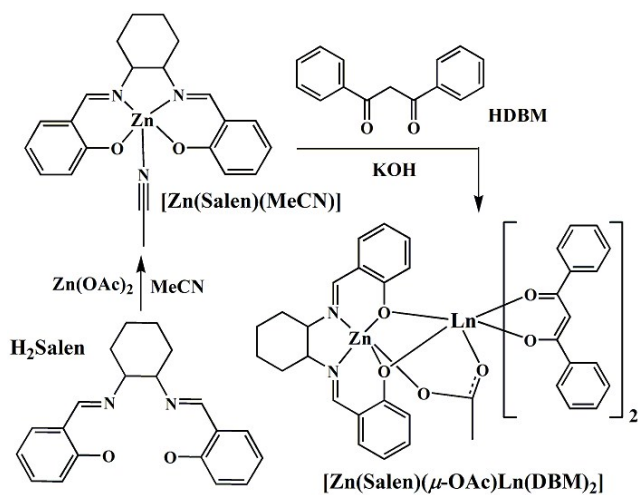

**Figure 1S.** TGA curves of complex **2** and PVK.

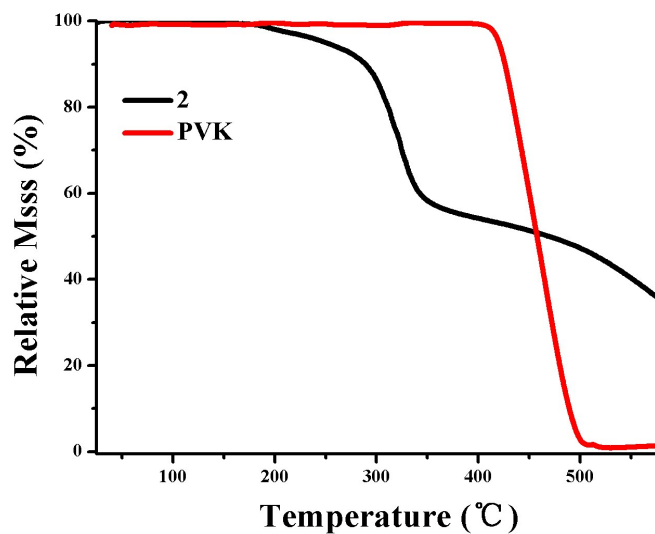

**Figure 2S.** Normalized UV-visible absorption spectra of the free ligand HDBM, the complex precursor [Zn(Salen)(MeCN)] and their complexes **2-4** in MeCN solution ( $10^{-5}$  M) and photoluminescent spectrum of PVK in film.

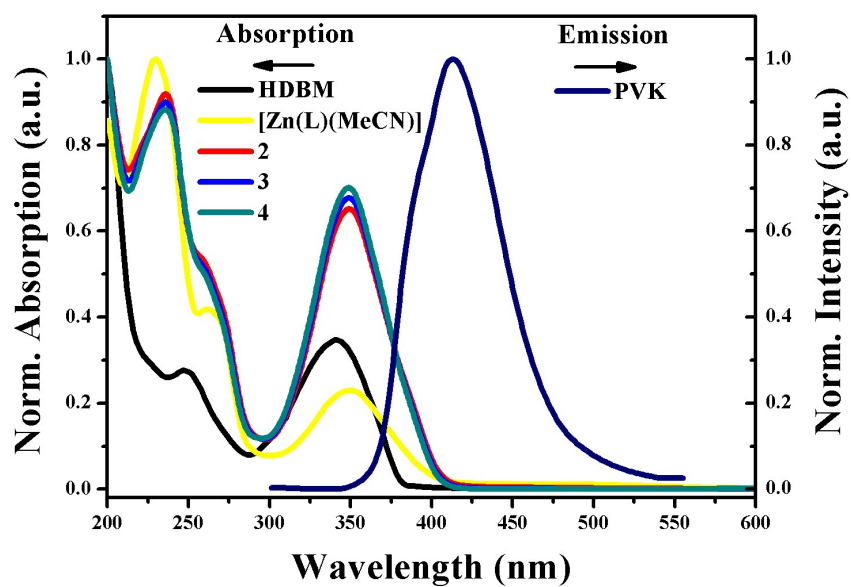

**Figure 3S.** Schematic energy level diagram and possible energy transfer for the complexes **2-3** and the EML1 of PVK:complex **2**.



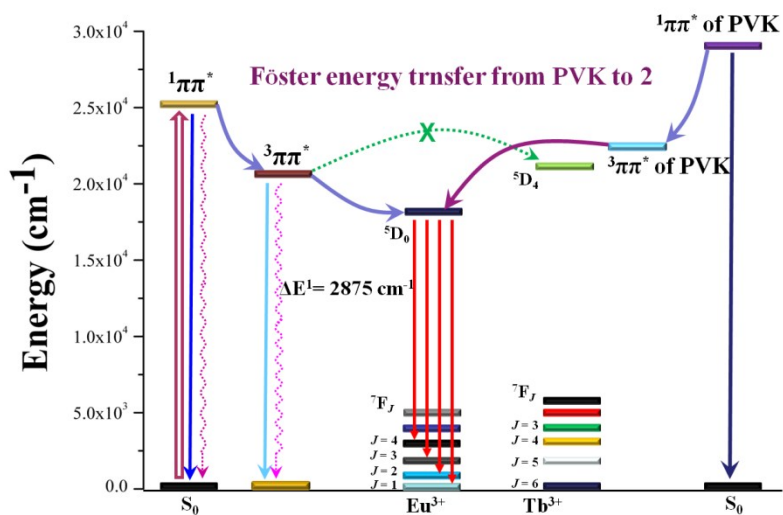

**Figure 4S.** Normalized visible emission spectra of PVK:complex 2 (20, 30 or 40 wt% of the doping content of complex 2 in PVK) in the solid state at RT.

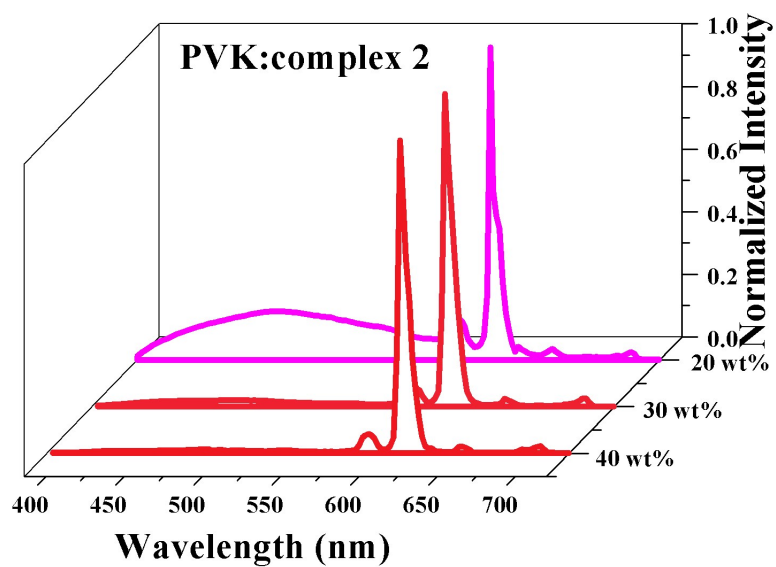

Supplement: c8tc06610h1.pdf [file c8tc06610h1.pdf]
